# Supplementary material
Source: PubMed Central journal article supplement (PMC5363078)
Supplement: NIHMS817577-supplement-1.pdf [file NIHMS817577-supplement-1.pdf]

SUPPLEMENTARY FIGURES

Supplementary Figure S1.

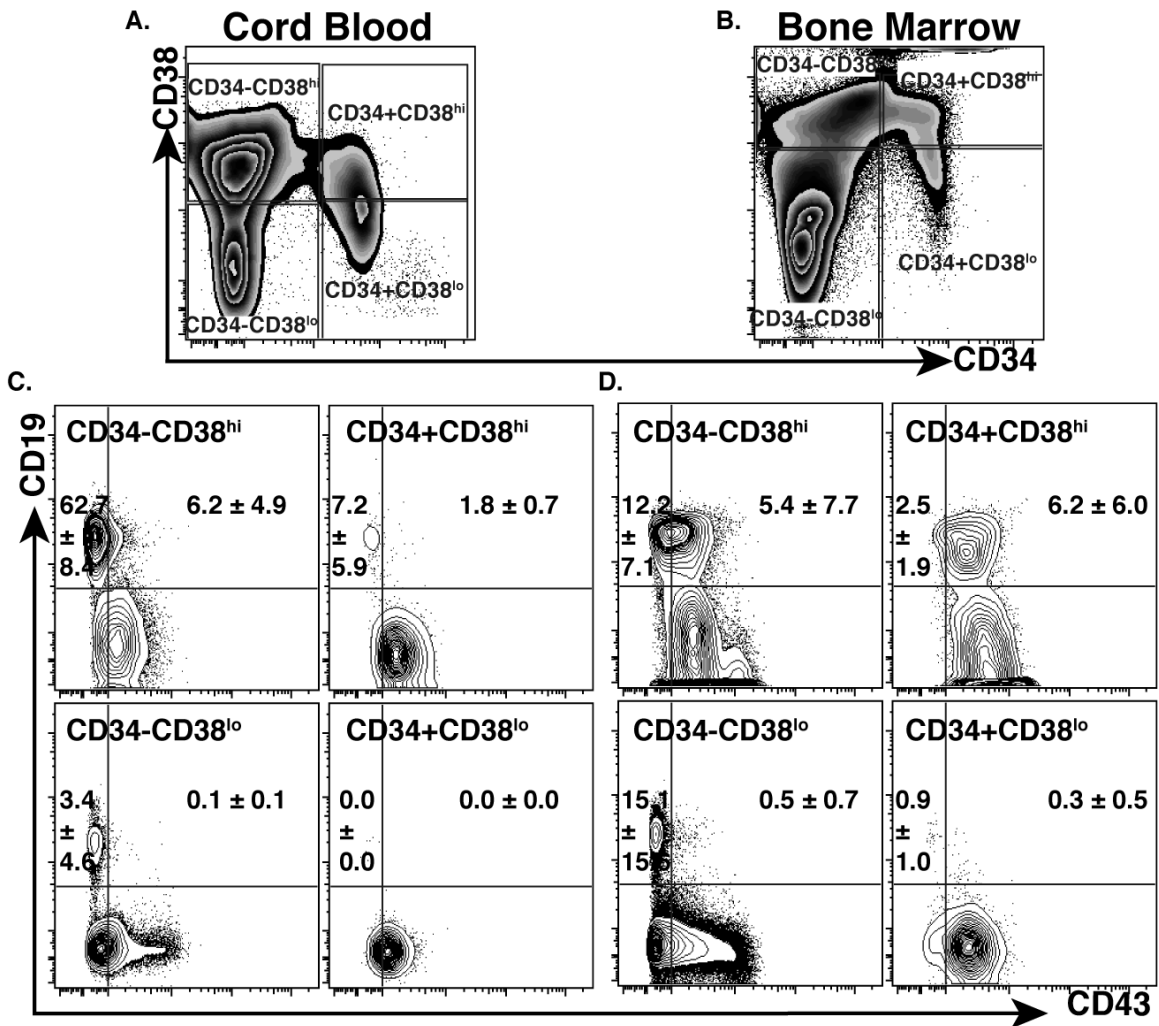

**S1. Frequency of cells coexpressing CD19 and CD43 increase as CD34<sup>+</sup> cells lose CD34 and gain CD38 expression.** Cord blood (n=9) and bone marrow (n=7) mononuclear cells were stained with anti-CD3/CD4/CD7, anti-CD19, anti-CD38, anti-CD34, anti-CD43, and Aqua Dead Cell kit **A-B**. Plots show CD38 versus CD34 expression on live CD3/4/7- gated cells from cord blood (**A**) and bone marrow (**B**). **C-D**. Plots show expression of CD19 versus CD43 on selected CD38/CD34 subsets from cord blood (**C**) and bone marrow (**D**). Numbers in each quadrant indicate frequencies ( $\pm$ SD) of CD19/CD43 subsets in CD34<sup>-</sup>CD38<sup>lo</sup>, CD34<sup>-</sup>CD38<sup>hi</sup>, CD34<sup>+</sup>CD38<sup>hi</sup> and CD34<sup>+</sup>CD38<sup>lo</sup> cells.

**Supplementary Figure S2.**

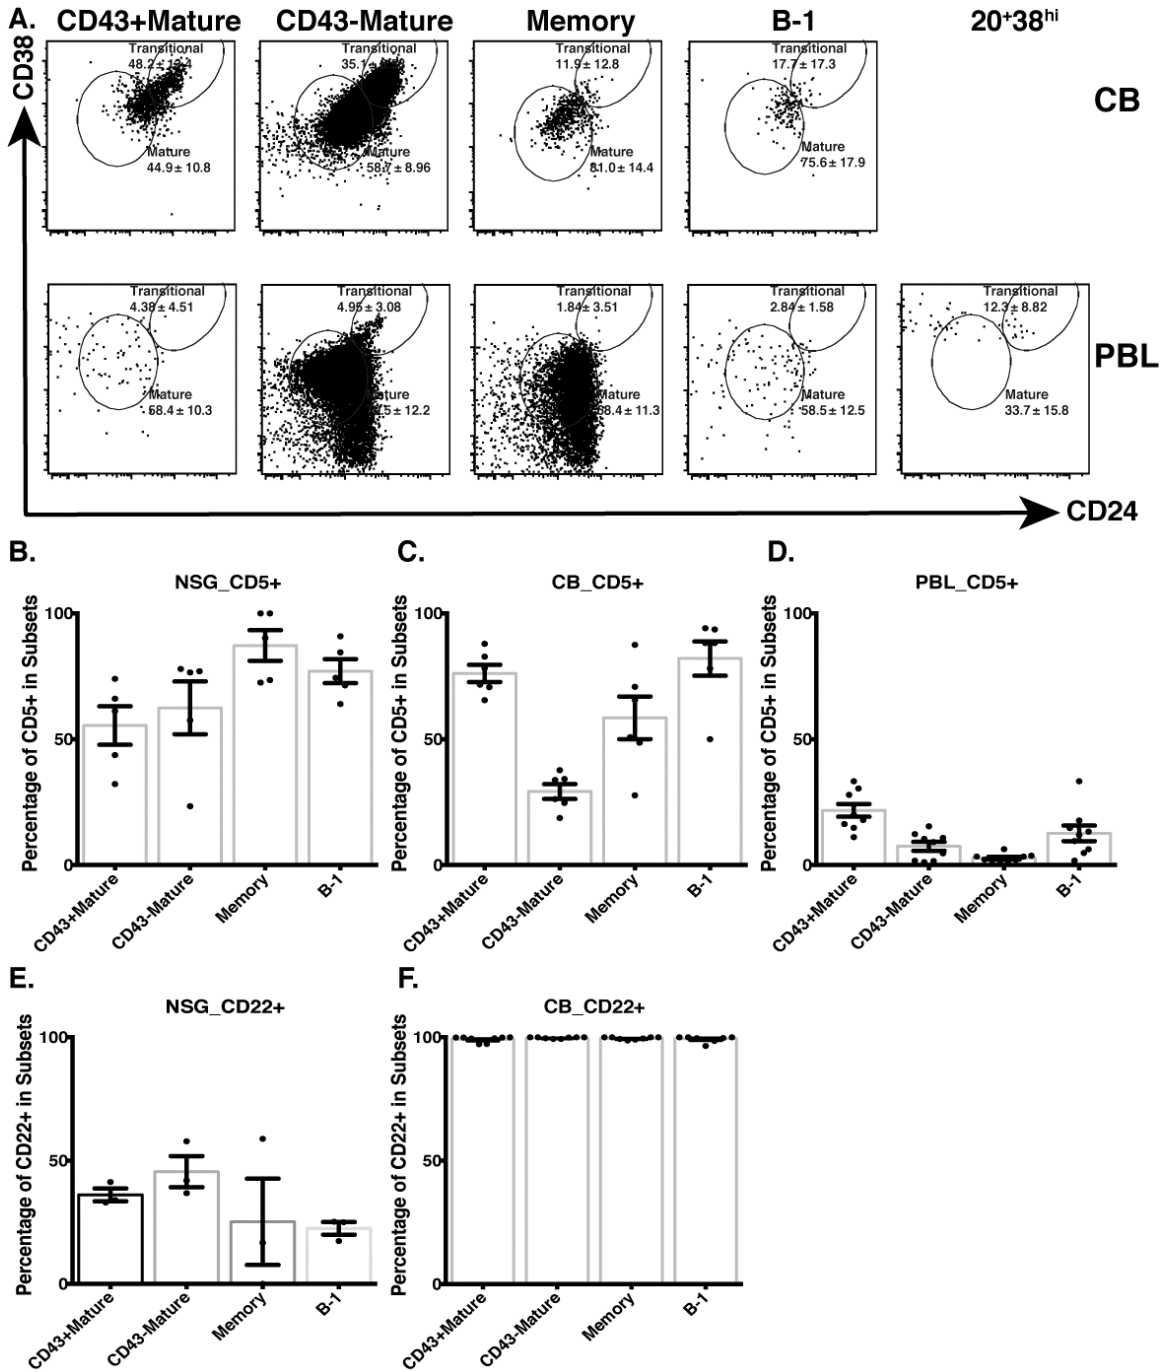

**S2. Surface antigen expression of B cell subsets from HIS mice as compared to those from cord blood and adult peripheral blood. A.** Plots display CD24 versus CD38 expression of different B cell subsets from Cord blood (n=6, top row) and adult peripheral blood (n=9, bottom row). Numbers show the average frequencies of gated cells and standard deviations. **B-D.** Plots

show the average frequencies of CD5+ cells in each B cell subset from HIS mice (B, n=5), cord blood (C, n= 6), and adult peripheral blood (D, n=9). **E-F.** Plots show the average frequencies of CD22+ cells in each B cell subset from HIS mice (E, n=3), cord blood (F, n= 8).

**Supplementary Figure S3.**

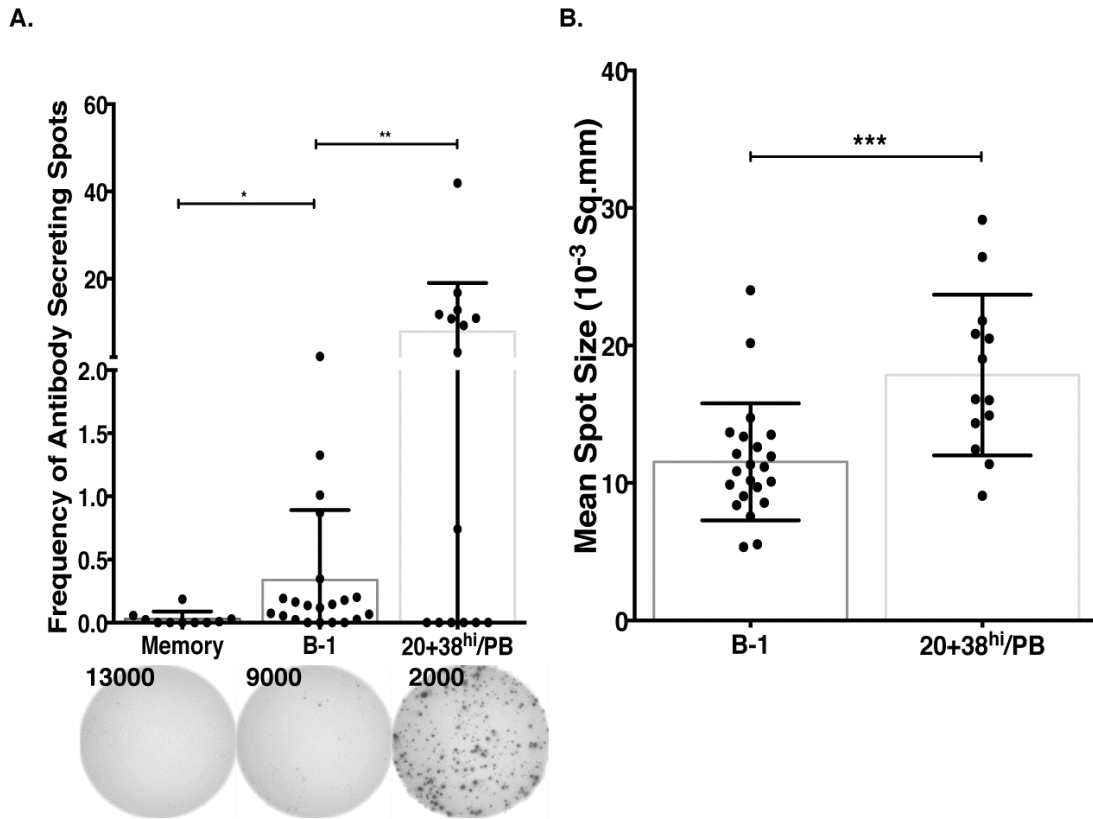

**S3. HIS B-1 and CD20<sup>+</sup>CD38<sup>hi</sup> preplasmablast phenotype cells spontaneously secrete antibodies, and memory cells do not. A.** Plots show the frequency of IgM antibody secreting spots from each cell subset following sort purification (n=10-21). Representative images of developed ELISPOT assays are shown with the top left number indicating the number of input cells that were plated. **B.** Plots show the mean spot size of IgM secreted antibodies by each subset.
